# Supplementary material for: Genetic deletion of the 67‐kDa isoform of glutamate decarboxylase alters conditioned fear behavior in rats
Source: PubMed Central journal article supplement (PMC7876494; doi:10.1002/2211-5463.13065), 2020-12-30
Supplement: FEB4-11-340-s001.pdf [file FEB4-11-340-s001.pdf]

## Supporting Information

# Genetic Deletion of Glutamate Decarboxylase 67-kDa Isoform Alters Conditioned Fear Behavior in Rats

Kazuyuki Fujihara<sup>1,2,\*</sup>, Takumi Sato<sup>1</sup>, Yoshiki Miyasaka<sup>3</sup>, Tomoji Mashimo<sup>4</sup>, and Yuchio Yanagawa<sup>1,\*</sup>

<sup>1</sup> Departments of Genetic and Behavioral Neuroscience, Graduate School of Medicine, Gunma University, 371-8511 Maebashi, Gunma, Japan

<sup>2</sup> Department of Psychiatry and Neuroscience, Graduate School of Medicine, Gunma University, 371-8511 Maebashi, Gunma, Japan

<sup>3</sup> Institute of Experimental Animal Sciences, Graduate School of Medicine, Osaka University 565-0871 Suita, Osaka, Japan

<sup>4</sup> Laboratory Animal Research Center, Institute of Medical Science, the University of Tokyo 108-8639 Tokyo, Japan

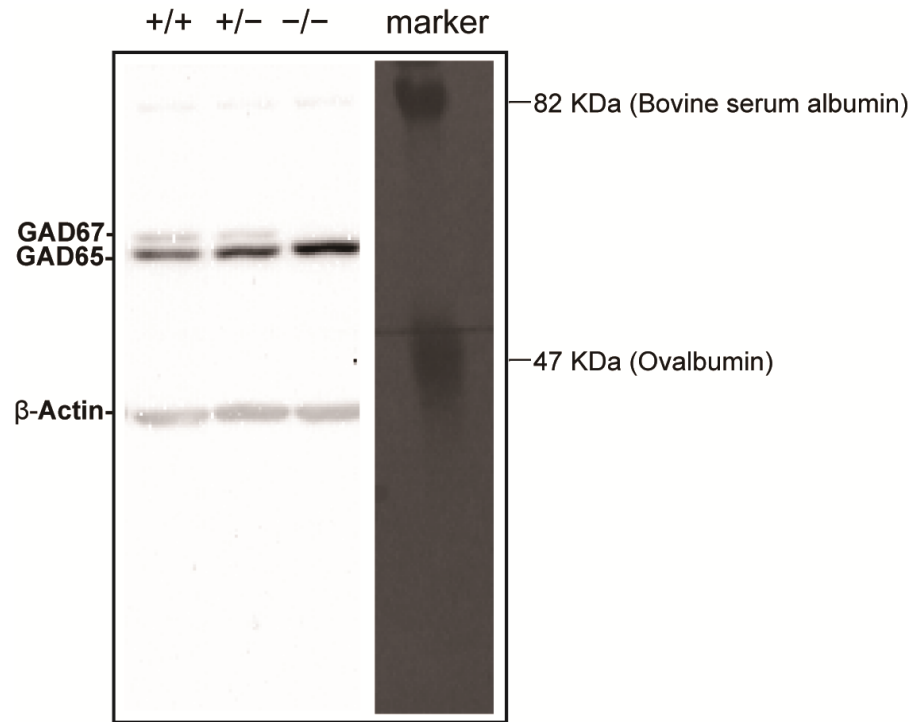

**Supplementary Figure S1.** Western blot analysis of GAD67 and GAD65 (whole brain taken from 3-months-old rats). GAD67 protein was undetectable in *Gad1* knockout (KO) rat, while GAD65 remains expressed.  $\beta$ -Actin was also evaluated as an internal control. +/+, wild-type; +/-, heterozygous *Gad1* KO; -/- homozygous *Gad1* KO.

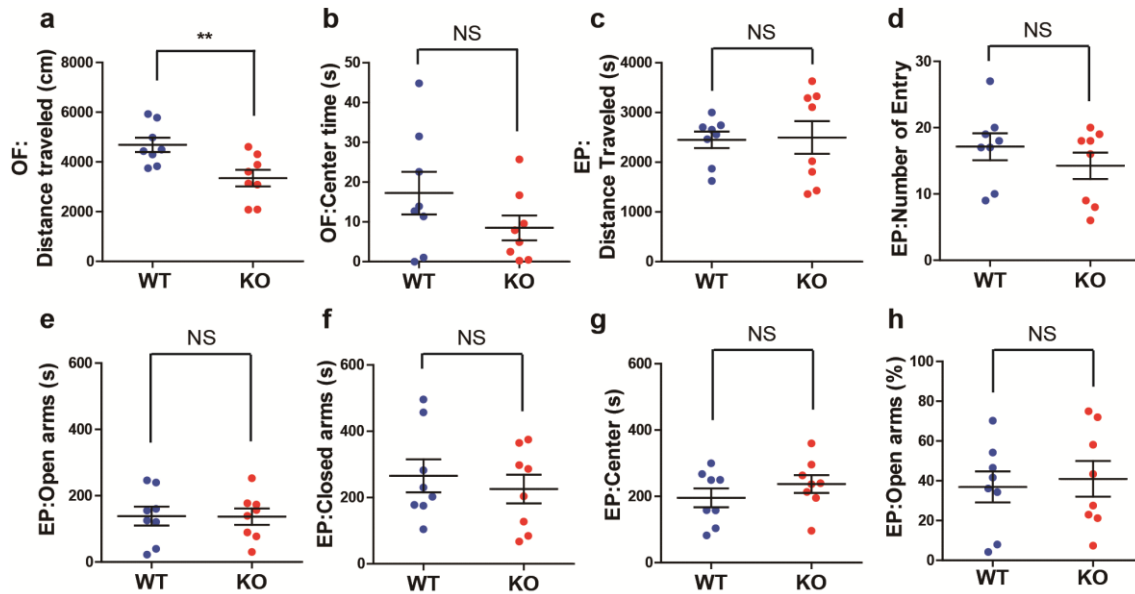

**Supplementary Figure S2.** *Gad1* KO rats showed hypoactivity in open field test and no alterations in anxiety-like behaviors in elevated plus maze test. a–b Open field test ( $n = 8$  for each genotype). (a) *Gad1* KO rats exhibited decreased distance traveled compared with *Gad1* WT rats ( $t(13.735) = 3.0368$ ,  $p < 0.01$ , Cohen's  $d = 1.518424$ ). (b) The center time of *Gad1* KO rats was not significantly different from that of WT rats ( $t(11.239) = 1.4057$ ,  $p = 0.1869$ , Cohen's  $d = 0.702844$ ). c–h Elevated plus maze test ( $n = 8$  for each genotype). Neither the distance traveled (c), the number of entries into arms (d), the time on open-arms (e), the time on closed-arms (f), the time on center (g), nor the open-arms ratio (h) were significantly different between two genotypes (distance traveled,  $t(10.293) = 0.12119$ ,  $p = 0.9059$ , Cohen's  $d = 1.518424$ ; number of entries into arms,  $t(13.998) = 1.016$ ,  $p = 0.3269$ , Cohen's  $d = 0.5080204$ ; time on open-arms,  $t(13.674) = 0.044551$ ,  $p = 0.9651$ , Cohen's  $d = 0.02227566$ ; time on closed-arms,  $t(13.771) = 0.6048$ ,  $p = 0.5551$ , Cohen's  $d = 0.3024024$ ; time on center,  $t(13.962) = 1.0515$ ,  $p = 0.3109$ , Cohen's  $d = 0.5257378$ ; open-arms ratio,  $t(13.778) = 0.34131$ ,  $p = 0.738$ , Cohen's  $d = 0.1706572$ ). The results are presented as the average  $\pm$  SEM. \*  $p < 0.05$ , \*\*  $p < 0.01$ ., \*\*\*  $p < 0.001$ . WT: wild-type; KO: knockout; OF: open field; EP: elevated plus maze.

**a. CTX: day 2**

|                   | $\beta$ | $\beta SE$ | $t$   | $p$   |
|-------------------|---------|------------|-------|-------|
| Intercept         | 0.000   | 0.276      | 0     | 1     |
| genotype          | -0.1064 | 0.367      | -0.29 | 0.777 |
| distance traveled | 0.114   | 0.356      | 0.32  | 0.754 |

R-squared: 0.008784, Adjusted R-squared: -0.1437

$F(2, 13) = 0.0576, p = 0.9443$

**b. CTX: day 3**

|                   | $\beta$ | $\beta SE$ | $t$    | $p$   |
|-------------------|---------|------------|--------|-------|
| Intercept         | 0.000   | 0.246      | 0      | 1     |
| genotype          | -0.4545 | 0.327      | -1.39  | 0.188 |
| distance traveled | -0.0356 | 0.317      | -0.112 | 0.912 |

Multiple R-squared: 0.2147, Adjusted R-squared: 0.09386

$F(2, 13) = 1.777, p = 0.2079$

**c. CTX: day 4**

|                   | $\beta$  | $\beta SE$ | $t$    | $p$      |
|-------------------|----------|------------|--------|----------|
| Intercept         | 0.000    | 0.233      | 0      | 1        |
| genotype          | -0.5506  | 0.310      | -1.774 | 0.0994 † |
| distance traveled | -0.01219 | 0.300      | -0.041 | 0.9683   |

Multiple R-squared: 0.2926, Adjusted R-squared: 0.1837

$F(2, 13) = 2.688, p = 0.1054$

**d. CTX: day 5**

|                   | $\beta$  | $\beta SE$ | $t$    | $p$             |
|-------------------|----------|------------|--------|-----------------|
| Intercept         | 0.000    | 0.203      | 0      | 1               |
| genotype          | -0.6596  | 0.270      | -2.439 | <b>0.0298</b> * |
| distance traveled | -0.06314 | 0.262      | -0.241 | 0.8132          |

Multiple R-squared: 0.4627, Adjusted R-squared: 0.3801

$F(2, 13) = 5.598, p = \mathbf{0.01763}^*$

**Supplementary Table S1.** General linear models describing the relationships between the freezing time on each day and genotype in the CTX experiment. The distance traveled in the open field test was included as a covariate.  $\beta$ , standardized partial regression coefficient;  $SE$ , standard error. † $p < 0.1$ , \*  $p < 0.05$ .
